# Supplementary material
Source: publisher site journal article supplement (https://www.spandidos-publications.com/4041/downloadSupplementary)
Supplement: Supplementary file 1 [file downloadSupplementary]

## Sheet: 1
Table SII. Sampling procedure r1 to establish an estimate for the probability of the basic splice event set.
Yellow colors for readability.
SP' (JC samples)
Number of splice event sets per sample: 5.
Number of original and unique GO terms over all splice event sets: 507.
Common GO terms over all 5 sets: 1.
Results
GOterm sampling from 18443 Go terms assuming an overlap size of greater 95% to the original set.
The mean overlap found in the sampling approach: 13.9 - with a range of 2 to 34.
P value: 0 - means the original set could not be reproduced based on the overlap size.
NSP' (JC samples)
Number of splice event sets per sample: 5.
Number of original and unique GO terms over all splice event sets: 222.
Common GO terms over all 5 sets: 3.
Results
GOterm sampling from 18443 Go terms assuming an overlap size of greater 95% to the original set.
The mean overlap found in the sampling approach: 2.7 - with a range of 0 to 11.
P value: 0 - means the original set could not be reproduced based on the overlap size.
MSC' (JC samples)
Number of splice event sets per sample: 5.
Number of original and unique GO terms over all splice event sets: 2399.
Common GO terms over all 5 sets: 29.
Results
GOterm sampling from 18443 Go terms assuming an overlap size of greater 95% to the original set.
The mean overlap found in the sampling approach: 312 - with a range of 250 to 376.
P value: 0 - means the original set could not be reproduced based on the overlap size.
SP' and MSC' (JC samples)
Number of splice event sets per sample: 10.
Number of original and unique GO terms over all splice event sets: 2624.
Common GO terms over all 5 sets: 1.
Results
GOterm sampling from 18443 Go terms assuming an overlap size of greater 95% to the original set.
The mean overlap found in the sampling approach: 373.2 - with a range of 306 to 454.
P value: 0 - means the original set could not be reproduced based on the overlap size.

## Sheet: 2
Sampling procedure r2 to validate the sparse GO term overlap
Green denotes the Figure 2 comparisons while gray indicates significance; other colors for readability.
Sampling hit: greater than 95% GO term similarity in the respective splice event groups based on the normalized overlap.
P value range from 0 to 1.
sampling procedure	r2
SP' (JC samples)
sampling of	GO set
	sample	507
sampling #	50000
	hit	p.value
sp.SE.JC_sp.A5.JC	14506	0.29012
sp.SE.JC_sp.A3.JC	0	0
sp.SE.JC_sp.MX.JC	7075	0.1415
sp.SE.JC_sp.RI.JC	0	0
sp.A5.JC_sp.A3.JC	9707	0.19414
sp.A5.JC_sp.MX.JC	6790	0.1358
sp.A5.JC_sp.RI.JC	2041	0.04082
sp.A3.JC_sp.MX.JC	17005	0.3401
sp.A3.JC_sp.RI.JC	5	0.0001
sp.MX.JC_sp.RI.JC	11709	0.23418
NSP' (JC samples)
sampling of	GO set
	sample	222
sampling #	50000
	hit	p.value
nsp.SE.JC_nsp.A5.JC	0	0
nsp.SE.JC_nsp.A3.JC	7062	0.14124
nsp.SE.JC_nsp.MX.JC	7888	0.15776
nsp.SE.JC_nsp.RI.JC	0	0
nsp.A5.JC_nsp.A3.JC	4014	0.08028
nsp.A5.JC_nsp.MX.JC	8457	0.16914
nsp.A5.JC_nsp.RI.JC	0	0
nsp.A3.JC_nsp.MX.JC	2138	0.04276
nsp.A3.JC_nsp.RI.JC	107	0.00214
nsp.MX.JC_nsp.RI.JC	2526	0.05052
MSC' (JC samples)
sampling of	GO set
	sample	2399
sampling #	50000
	hit	p.value
msc.SE.JC_msc.A5.JC	0	0
msc.SE.JC_msc.A3.JC	16189	0.32378
msc.SE.JC_msc.MX.JC	0	0
msc.SE.JC_msc.RI.JC	0	0
msc.A5.JC_msc.A3.JC	362	0.00724
msc.A5.JC_msc.MX.JC	1	2e-05
msc.A5.JC_msc.RI.JC	29	0.00058
msc.A3.JC_msc.MX.JC	0	0
msc.A3.JC_msc.RI.JC	0	0
msc.MX.JC_msc.RI.JC	0	0
SP' and MSC' (JC samples)
sampling of	GO set
	sample	2624
sampling #	50000
	hit	p.value
sp.SE.JC_sp.A5.JC	235	0.0047
sp.SE.JC_sp.A3.JC	28	0.00056
sp.SE.JC_sp.MX.JC	225	0.0045
sp.SE.JC_sp.RI.JC	559	0.01118
sp.SE.JC_msc.SE.JC	0	0
sp.SE.JC_msc.A5.JC	6127	0.12254
sp.SE.JC_msc.A3.JC	30	0.0006
sp.SE.JC_msc.MX.JC	5	0.0001
sp.SE.JC_msc.RI.JC	14094	0.28188
sp.A5.JC_sp.A3.JC	705	0.0141
sp.A5.JC_sp.MX.JC	1424	0.02848
sp.A5.JC_sp.RI.JC	0	0
sp.A5.JC_msc.SE.JC	15261	0.30522
sp.A5.JC_msc.A5.JC	377	0.00754
sp.A5.JC_msc.A3.JC	24	0.00048
sp.A5.JC_msc.MX.JC	30	0.0006
sp.A5.JC_msc.RI.JC	1174	0.02348
sp.A3.JC_sp.MX.JC	11293	0.22586
sp.A3.JC_sp.RI.JC	207	0.00414
sp.A3.JC_msc.SE.JC	1821	0.03642
sp.A3.JC_msc.A5.JC	339	0.00678
sp.A3.JC_msc.A3.JC	2017	0.04034
sp.A3.JC_msc.MX.JC	116	0.00232
sp.A3.JC_msc.RI.JC	4619	0.09238
sp.MX.JC_sp.RI.JC	1331	0.02662
sp.MX.JC_msc.SE.JC	11967	0.23934
sp.MX.JC_msc.A5.JC	455	0.0091
sp.MX.JC_msc.A3.JC	5311	0.10622
sp.MX.JC_msc.MX.JC	402	0.00804
sp.MX.JC_msc.RI.JC	2684	0.05368
sp.RI.JC_msc.SE.JC	103	0.00206
sp.RI.JC_msc.A5.JC	0	0
sp.RI.JC_msc.A3.JC	0	0
sp.RI.JC_msc.MX.JC	0	0
sp.RI.JC_msc.RI.JC	0	0
msc.SE.JC_msc.A5.JC	3	6e-05
msc.SE.JC_msc.A3.JC	58	0.00116
msc.SE.JC_msc.MX.JC	4565	0.0913
msc.SE.JC_msc.RI.JC	0	0
msc.A5.JC_msc.A3.JC	35	0.0007
msc.A5.JC_msc.MX.JC	0	0
msc.A5.JC_msc.RI.JC	0	0
msc.A3.JC_msc.MX.JC	0	0
msc.A3.JC_msc.RI.JC	0	0
msc.MX.JC_msc.RI.JC	0	0

## Sheet: 3
Sampling procedure r3 on the gene level to establish an estimate for the impact of the specific gene set combination
Green denotes the Figure 2 comparisons while gray indicates significance; other colors for readability.
Sampling hit: greater than 95% GO term similarity in the respective splice event groups based on the normalized overlap.
P value range from 0 to 1.
sampling procedure	r3
SP' (JC samples)
sampling of	gene set
	sample	30
sampling #	10000
	hit	p.value
sp.SE.JC_sp.A5.JC	704	0.0704
sp.SE.JC_sp.A3.JC	99	0.0099
sp.SE.JC_sp.MX.JC	263	0.0263
sp.SE.JC_sp.RI.JC	6	0.0006
sp.A5.JC_sp.A3.JC	424	0.0424
sp.A5.JC_sp.MX.JC	480	0.048
sp.A5.JC_sp.RI.JC	557	0.0557
sp.A3.JC_sp.MX.JC	1	0.0001
sp.A3.JC_sp.RI.JC	0	0
sp.MX.JC_sp.RI.JC	34	0.0034
NSP' (JC samples)
sampling of	gene set
	sample	23
sampling #	10000
	hit	p.value
nsp.SE.JC_nsp.A5.JC	1040	0.104
nsp.SE.JC_nsp.A3.JC	35	0.0035
nsp.SE.JC_nsp.MX.JC	60	0.006
nsp.SE.JC_nsp.RI.JC	0	0
nsp.A5.JC_nsp.A3.JC	733	0.0733
nsp.A5.JC_nsp.MX.JC	638	0.0638
nsp.A5.JC_nsp.RI.JC	0	0
nsp.A3.JC_nsp.MX.JC	3	0.0003
nsp.A3.JC_nsp.RI.JC	0	0
nsp.MX.JC_nsp.RI.JC	3	0.0003
MSC' (JC samples)
sampling of	gene set
	sample	267
sampling #	10000
	hit	p.value
msc.SE.JC_msc.A5.JC	2176	0.2176
msc.SE.JC_msc.A3.JC	246	0.0246
msc.SE.JC_msc.MX.JC	47	0.0047
msc.SE.JC_msc.RI.JC	0	0
msc.A5.JC_msc.A3.JC	2542	0.2542
msc.A5.JC_msc.MX.JC	1550	0.155
msc.A5.JC_msc.RI.JC	1174	0.1174
msc.A3.JC_msc.MX.JC	0	0
msc.A3.JC_msc.RI.JC	0	0
msc.MX.JC_msc.RI.JC	3	0.0003
SP' versus MSC' (JC samples)
sampling of	gene set
	sample	297
sampling #	10000
	hit	p.value
sp.SE.JC_sp.A5.JC	487	0.0487
sp.SE.JC_sp.A3.JC	51	0.0051
sp.SE.JC_sp.MX.JC	92	0.0092
sp.SE.JC_sp.RI.JC	5	0.0005
sp.SE.JC_msc.SE.JC	11	0.0011
sp.SE.JC_msc.A5.JC	379	0.0379
sp.SE.JC_msc.A3.JC	2583	0.2583
sp.SE.JC_msc.MX.JC	2498	0.2498
sp.SE.JC_msc.RI.JC	2127	0.2127
sp.A5.JC_sp.A3.JC	381	0.0381
sp.A5.JC_sp.MX.JC	369	0.0369
sp.A5.JC_sp.RI.JC	512	0.0512
sp.A5.JC_msc.SE.JC	32	0.0032
sp.A5.JC_msc.A5.JC	507	0.0507
sp.A5.JC_msc.A3.JC	557	0.0557
sp.A5.JC_msc.MX.JC	535	0.0535
sp.A5.JC_msc.RI.JC	519	0.0519
sp.A3.JC_sp.MX.JC	3	0.0003
sp.A3.JC_sp.RI.JC	0	0
sp.A3.JC_msc.SE.JC	751	0.0751
sp.A3.JC_msc.A5.JC	1030	0.103
sp.A3.JC_msc.A3.JC	819	0.0819
sp.A3.JC_msc.MX.JC	1022	0.1022
sp.A3.JC_msc.RI.JC	824	0.0824
sp.MX.JC_sp.RI.JC	17	0.0017
sp.MX.JC_msc.SE.JC	426	0.0426
sp.MX.JC_msc.A5.JC	618	0.0618
sp.MX.JC_msc.A3.JC	303	0.0303
sp.MX.JC_msc.MX.JC	515	0.0515
sp.MX.JC_msc.RI.JC	565	0.0565
sp.RI.JC_msc.SE.JC	540	0.054
sp.RI.JC_msc.A5.JC	19	0.0019
sp.RI.JC_msc.A3.JC	197	0.0197
sp.RI.JC_msc.MX.JC	10	0.001
sp.RI.JC_msc.RI.JC	31	0.0031
msc.SE.JC_msc.A5.JC	905	0.0905
msc.SE.JC_msc.A3.JC	296	0.0296
msc.SE.JC_msc.MX.JC	63	0.0063
msc.SE.JC_msc.RI.JC	0	0
msc.A5.JC_msc.A3.JC	2532	0.2532
msc.A5.JC_msc.MX.JC	1512	0.1512
msc.A5.JC_msc.RI.JC	1091	0.1091
msc.A3.JC_msc.MX.JC	0	0
msc.A3.JC_msc.RI.JC	0	0
msc.MX.JC_msc.RI.JC	4	0.0004
